# Supplementary material
Source: MDPI journal article supplement (https://www.mdpi.com/2073-4344/11/10/1236)
Supplement: s1 [file s1]

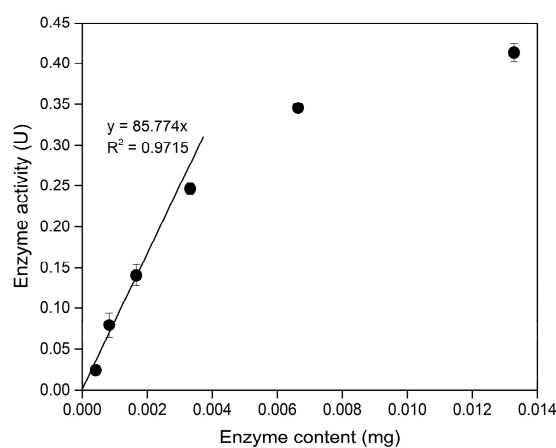

**Figure S1.** Hydrolytic activity versus the mass of enzyme curves found for *p*-NPB hydrolysis using commercial Eversa® Transform 2.0 lipase.

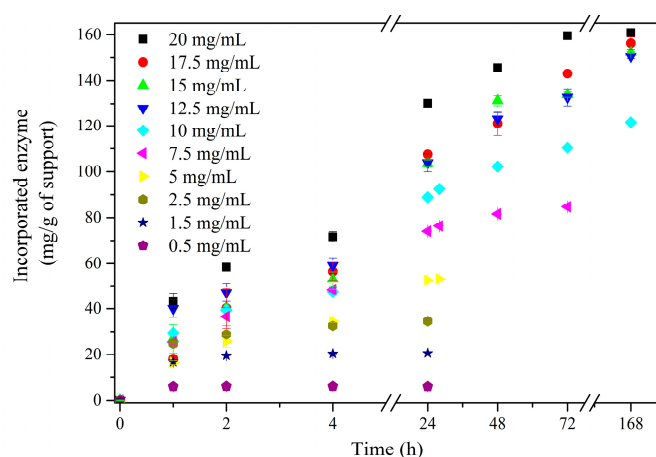

**Figure S2.** Immobilization kinetics of Eversa® Transform 2.0 lipase on Immobead IB-ADS-3.

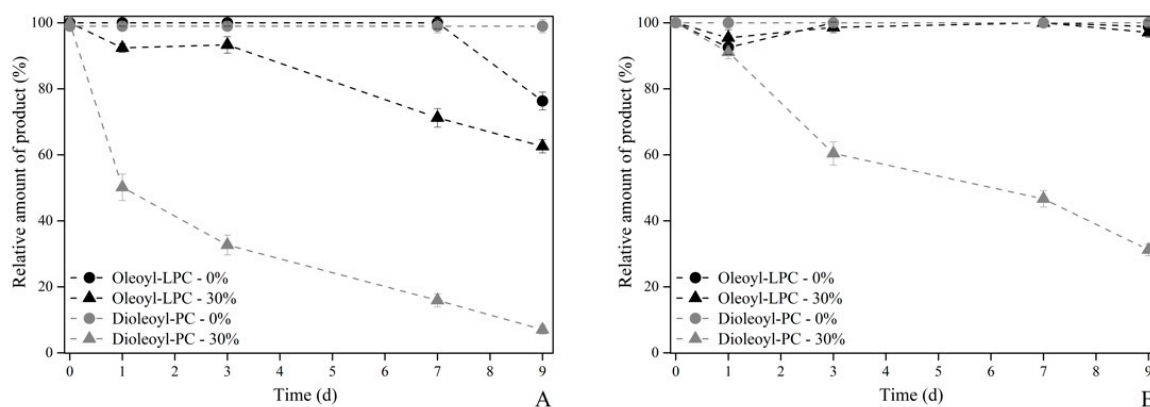

**Figure S3.** Kinetic curves for the stability of Eversa® Transform 2.0 lipase immobilized on Immobead IB-ADS-3 (ADS3) on the Glycerophosphocholine (GPC) esterification with oleic acid under different concentrations of butanone. (A) after 24h of reaction and (B) after 48h of reaction. Dotted lines are presented to improve visualization.
